# Supplementary material
Source: PubMed Central journal article supplement (PMC2635526)
Supplement: jn.108.098624_1.pdf [file jn.108.098624_1.pdf]

## Barnes et al., Supplemental Figure 1

### Body Weight

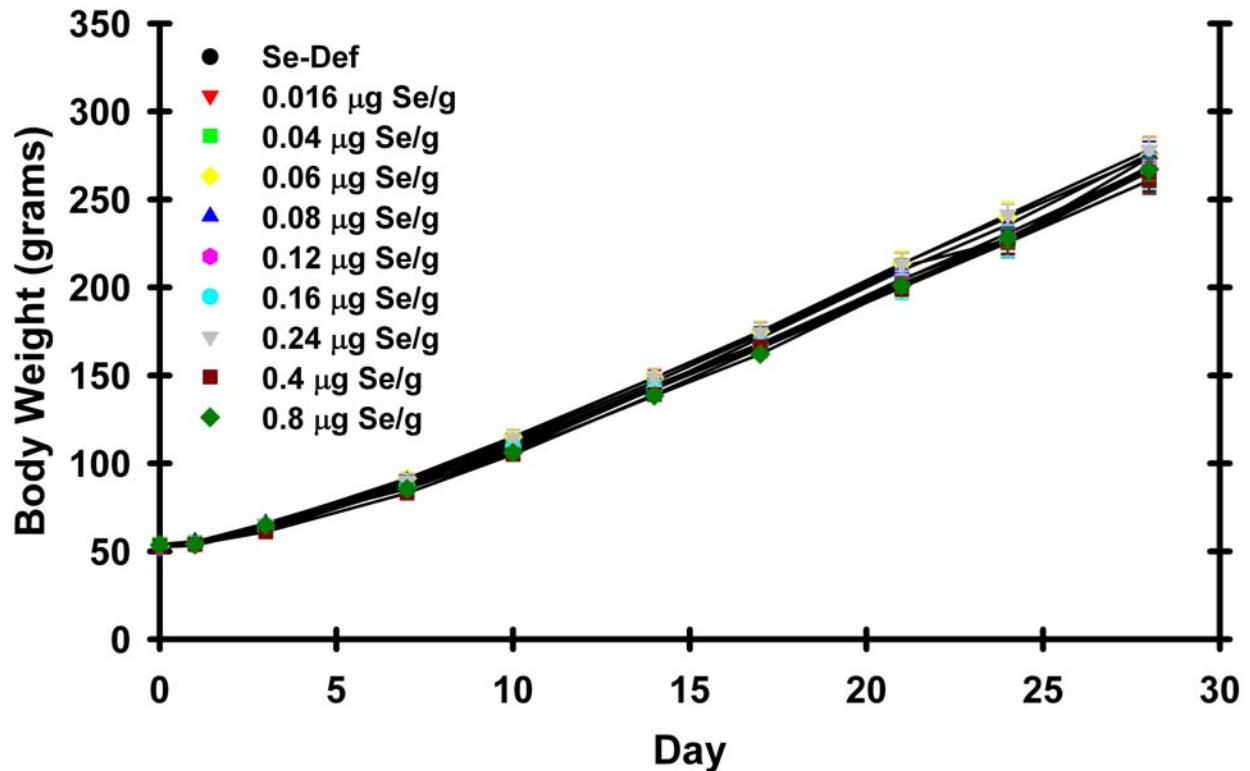

**SUPPLEMENTAL FIGURE 1** Effect of dietary Se on rat body weight. Male weanling rats were supplemented with Se at the indicated levels for 28 d (n = 5 or 6/diet) and weighed biweekly. Values are the mean weights  $\pm$  SEM. There were no significant effects ( $P > 0.05$ ) of dietary Se level at any timepoint.

## Online Supporting Material - Barnes et al.

**SUPPLEMENTAL TABLE 1** Selenoprotein genes and qRT-PCR primers for rat selenoproteins

| Gene <sup>1</sup> | Accession <sup>2</sup> | Gene Name                                | Forward Primer <sup>3</sup> | Reverse Primer <sup>3</sup> |
|-------------------|------------------------|------------------------------------------|-----------------------------|-----------------------------|
| Actb              | NM_031144              | Actin, beta                              | 5'-cctgggatggaatcctgtg      | 5'-cttctgcatcctgtcagcaa     |
| Dio1              | NM_021653              | Deiodinase, iodothyronine, type I        | 5'-gcctctcaggacagaagtgc     | 5'-gtcagctgtggaggcaaagt     |
| Dio2              | NM_031720              | Deiodinase, iodothyronine, type II       | 5'-ggactacgctgtgtctggaa     | 5'-ctgcacaggcaaagtcaaga     |
| Dio3              | NM_017210              | Deiodinase, iodothyronine, type III      | 5'-ctgtgctctggttctggaca     | 5'-cgcaactcagacacctgga      |
| Gapdh             | NM_017008              | Glyceraldehyde-3-phosphate dehydrogenase | 5'-ccatcaccatctccaggag      | 5'-cggagatgatgaccctttg      |
| Gpx1              | NM_030826              | Glutathione peroxidase 1                 | 5'-gctgctcattgagaatgctg     | 5'-gaatctctcattcttgccatt    |
| Gpx2              | NM_183403              | Glutathione peroxidase 2                 | 5'-cctagtggttctcggttcc      | 5'-tgcccattgacatcacact      |
| Gpx3              | NM_022525              | Glutathione peroxidase 3                 | 5'-cgagtagggagccctacca      | 5'-aatgggccaagtctcttg       |
| Gpx4              | NM_017165              | Glutathione peroxidase 4                 | 5'-ccggctacaatgtcaggttt     | 5'-acgcagccgttctatcaat      |
| Selh              | NM_001114939           | Selenoprotein H                          | 5'-aactggaggccccagagata     | 5'-ggctcaggaaatttgagcttt    |
| Seli              | XM_343031              | Selenoprotein I                          | 5'-tcactgctgcctcactctg      | 5'-ggaccgatactcttcttcca     |
| Selk              | NM_207589              | Selenoprotein K                          | 5'-aaccggaggaaagatggttt     | 5'-ccccgtagcctctcttttc      |
| Selm              | XM_001115013           | Selenoprotein M                          | 5'-aaggagggtgaaggcctttgt    | 5'-tcatttggtgagtgaggatt     |
| Sepr1             | XM_342942              | Selenoprotein N                          | 5'-gttcaccggccatcatct       | 5'-catgttgctggtctactgg      |
| Selo              | NM_001085485           | Selenoprotein O                          | 5'-ctcattggcactcaagcaaa     | 5'-tccttgccagacgctctct      |
| Sepp1 (SelP)      | NM_019192              | Selenoprotein P                          | 5'-tccttcctcactttcccgtg     | 5'-tctgagggtctgtggtttt      |
| Seprx1 (MsrB1)    | NM_001044285           | Methionine-R-sulfoxide reductase         | 5'-aagtgcggctatgagctgtt     | 5'-acttgccacaggacaccttt     |
| Sels              | NM_173120              | Selenoprotein S                          | 5'-cttcagctgcctctctct       | 5'-ctgcattctcaaacgagcag     |
| Selt              | NM_001014253           | Selenoprotein T                          | 5'-cgtgccagcaagagatta       | 5'-tcaatcggtatgtctggata     |
| Selv              | XR_009209              | Selenoprotein V                          | 5'-cccagcacagaacttcgttt     | 5'-tgatgctccagggtctttt      |
| Sepw1             | NM_013027              | Selenoprotein W                          | 5'-gccaagtatctccagctca      | 5'-ttccggaactgctctctgt      |
| Sep15             | NM_133297              | Selenoprotein 15                         | 5'-ctgcatctccttgacagt       | 5'-ggaacctcccaattttcat      |
| Sephs2 (SPS2)     | NM_001079889           | Selenophosphate synthetase 2             | 5'-actcagtgtagccagagca      | 5'-cccaccgatgataatccaag     |
| Txnrd1            | NM_031614              | Thioredoxin reductase 1                  | 5'-ggcctgcagctactgtaat      | 5'-tccctgctcaatctgttca      |
| Txnrd2            | NM_022584              | Thioredoxin reductase 2                  | 5'-cgctggagaagtacacaag      | 5'-cagtaggatccaggccagag     |
| Txnrd3            | NM_001106609           | Thioredoxin reductase 3                  | 5'-tgaagtacacaggggtttg      | 5'-gtaatgtccagccctgagga     |

<sup>1</sup>Gene symbol with common alternative symbol given in parentheses.

<sup>2</sup>Accession number from NCBI Entrez Gene database.

<sup>3</sup>Forward and reverse primers used to amplify ~150 bp qRT-PCR product that span an intron.

## Online Supporting Material - Barnes et al.

**SUPPLEMENTAL TABLE 2** Effect of dietary selenium on tissue selenium concentration and selenoenzyme activity in rats (Expt. 2)<sup>1</sup>.

| Biomarker                | 0                      | 0.016                   | 0.04                     | 0.06                     | Dietary Se ( $\mu\text{g Se/g diet}$ )            |                           |                           |                          |                          |                          | ANOVA<br><i>P</i> -value |
|--------------------------|------------------------|-------------------------|--------------------------|--------------------------|---------------------------------------------------|---------------------------|---------------------------|--------------------------|--------------------------|--------------------------|--------------------------|
|                          |                        |                         |                          |                          | 0.08                                              | 0.12                      | 0.16                      | 0.24                     | 0.4                      | 0.8                      |                          |
|                          |                        |                         |                          |                          | <i><math>\mu\text{mol Se/g wet weight}</math></i> |                           |                           |                          |                          |                          |                          |
| Liver Se <sup>2</sup>    | 0.20±0.01 <sup>a</sup> | 0.73±0.05 <sup>a</sup>  | 2.50±0.20 <sup>ab</sup>  | 4.58±0.34 <sup>bc</sup>  | 6.31±0.29 <sup>cd</sup>                           | 7.44±0.51 <sup>de</sup>   | 7.56±0.53 <sup>de</sup>   | 7.03±0.36 <sup>cd</sup>  | 10.13±0.23 <sup>ef</sup> | 12.62±0.96 <sup>f</sup>  | <0.0001                  |
| Kidney Se <sup>2</sup>   | 1.56±0.15 <sup>a</sup> | 3.38±0.19 <sup>ab</sup> | 6.74±0.64 <sup>abc</sup> | 7.63±0.44 <sup>bcd</sup> | 9.33±0.05 <sup>cd</sup>                           | 11.54±0.32 <sup>cde</sup> | 11.42±0.71 <sup>cde</sup> | 13.13±0.51 <sup>de</sup> | 15.63±0.44 <sup>ef</sup> | 19.24±2.42 <sup>f</sup>  | <0.0001                  |
|                          |                        |                         |                          |                          | <i>EU/g protein</i>                               |                           |                           |                          |                          |                          |                          |
| Plasma Gpx3 <sup>2</sup> | 1.9±0.2 <sup>a</sup>   | 17.9±1.2 <sup>a</sup>   | 52.6±2.3 <sup>b</sup>    | 74.2±3.6 <sup>c</sup>    | 78.3±4.7 <sup>cd</sup>                            | 88.9±3.9 <sup>cde</sup>   | 95.6±2.8 <sup>cde</sup>   | 100.7±4.0 <sup>e</sup>   | 102.8±4.3 <sup>e</sup>   | 99.0±4.2 <sup>de</sup>   | <0.0001                  |
| RBC Gpx1 <sup>2</sup>    | 63.3±1.7 <sup>a</sup>  | 88.0±2.7 <sup>ab</sup>  | 130.4±4.2 <sup>bc</sup>  | 172.9±5.9 <sup>cd</sup>  | 219.6±4.7 <sup>de</sup>                           | 222.8±11.9 <sup>e</sup>   | 260.8±4.3 <sup>ef</sup>   | 290.5±10.6 <sup>f</sup>  | 342.3±12.4 <sup>g</sup>  | 434.1±11.8 <sup>h</sup>  | <0.0001                  |
| Liver Gpx1 <sup>2</sup>  | 14.9±2.2 <sup>a</sup>  | 19.8±1.9 <sup>a</sup>   | 186.5±22.4 <sup>a</sup>  | 503.3±44.3 <sup>b</sup>  | 661.4±11.4 <sup>bc</sup>                          | 834.0±53.3 <sup>cd</sup>  | 898.7±28.7 <sup>d</sup>   | 819.2±33.6 <sup>cd</sup> | 930.4±56.1 <sup>d</sup>  | 818.4±43.0 <sup>cd</sup> | <0.0001                  |
| Kidney Gpx1 <sup>2</sup> | 23.7±1.5 <sup>a</sup>  | 54.8±3.6 <sup>a</sup>   | 158.3±8.2 <sup>b</sup>   | 245.3±8.3 <sup>c</sup>   | 322.9±14.9 <sup>c</sup>                           | 425.9±19.8 <sup>d</sup>   | 477.0±13.1 <sup>d</sup>   | 490.8±20.9 <sup>d</sup>  | 500.3±16.6 <sup>d</sup>  | 497.1±5.2 <sup>d</sup>   | <0.0001                  |
| Muscle Gpx1 <sup>2</sup> | 5.2±0.9 <sup>a</sup>   | 9.5±1.1 <sup>a</sup>    | 21.7±1.4 <sup>ab</sup>   | 48.3±4.5 <sup>bc</sup>   | 51.9±4.0 <sup>bc</sup>                            | 73.1±6.6 <sup>cd</sup>    | 68.3±6.1 <sup>cd</sup>    | 85.0±5.7 <sup>cde</sup>  | 98.8±11.1 <sup>de</sup>  | 116.0±10.7 <sup>e</sup>  | <0.0001                  |
| Liver Gpx4               | 4.7±0.7 <sup>a</sup>   | 4.4±0.5 <sup>a</sup>    | 7.0±0.4 <sup>b</sup>     | 8.4±0.4 <sup>bc</sup>    | 9.2±0.4 <sup>cd</sup>                             | 10.6±0.6 <sup>d</sup>     | 9.9±0.6 <sup>cd</sup>     | 9.5±0.4 <sup>cd</sup>    | 9.3±0.6 <sup>cd</sup>    | 10.5±0.6 <sup>d</sup>    | <0.0001                  |
| Kidney Gpx4 <sup>2</sup> | 6.6±1.5 <sup>ab</sup>  | 5.7±0.2 <sup>a</sup>    | 9.0±0.1 <sup>abc</sup>   | 11.3±0.5 <sup>bcd</sup>  | 12.7±0.3 <sup>cd</sup>                            | 14.1±0.8 <sup>d</sup>     | 12.0±1.7 <sup>cd</sup>    | 14.0±0.5 <sup>d</sup>    | 13.0±0.5 <sup>cd</sup>   | 14.3±0.5 <sup>d</sup>    | <0.0001                  |
| Muscle Gpx4              | 3.0±0.3                | 2.3±1.1                 | 2.6±0.3                  | 2.8±0.9                  | 2.8±0.3                                           | 3.3±1.0                   | 2.6±0.5                   | 2.3±0.4                  | 3.3±0.8                  | 3.0±0.3                  | 0.832                    |
| Liver Trxrd <sup>2</sup> | 2.1±0.2 <sup>a</sup>   | 6.7±0.5 <sup>a</sup>    | 20.2±0.7 <sup>b</sup>    | 26.9±1.6 <sup>c</sup>    | 29.5±0.9 <sup>cd</sup>                            | 31.1±0.6 <sup>cd</sup>    | 30.9±0.8 <sup>cd</sup>    | 30.8±1.1 <sup>cd</sup>   | 34.1±0.9 <sup>d</sup>    | 34.7±1.0 <sup>d</sup>    | <0.0001                  |

<sup>1</sup>Values are presented as mean±SEM, n = 5 or 6/diet, except for liver Se, kidney Se, and muscle GPX4, n = 3/diet. Means in a row with superscripts without a common letter differ significantly, *P* < 0.05.

<sup>3</sup>Differences determined by Scheffé's test as variances were not homogeneous.

## Online Supporting Material - Barnes et al.

**SUPPLEMENTAL TABLE 3** Effect of dietary selenium on selenoprotein mRNA abundance in rats (Expt. 1)<sup>1</sup>.

| Tissue/<br>Gene     | Dietary Se (µg Se/g diet) |                         |                          |                         |                         |                         |                          |                         | ANOVA<br><i>P</i> -value |
|---------------------|---------------------------|-------------------------|--------------------------|-------------------------|-------------------------|-------------------------|--------------------------|-------------------------|--------------------------|
|                     | 0                         | 0.02                    | 0.05                     | 0.075                   | 0.1<br>% <sup>2</sup>   | 0.15                    | 0.2                      | 0.3                     |                          |
| Liver               |                           |                         |                          |                         |                         |                         |                          |                         |                          |
| Gpx1                | 12.2±1.0 <sup>a</sup>     | 30.9±5.2 <sup>b</sup>   | 65.7±3.7 <sup>c</sup>    | 97.1±3.1 <sup>d</sup>   | 103.8±2.4 <sup>d</sup>  | 105.4±10.4 <sup>d</sup> | 100.0±5.0 <sup>d</sup>   | 97.9±4.4 <sup>d</sup>   | < 0.0001                 |
| Gpx4                | 76.0±6.4                  | 82.4±5.2                | 79.9±7.4                 | 87.2±9.8                | 93.4±7.2                | 90.3±5.8                | 100.3±7.4                | 84.9±7.9                | 0.38                     |
| Selh                | 30.6±1.4 <sup>a</sup>     | 42.2±1.6 <sup>a</sup>   | 66.2±6.8 <sup>b</sup>    | 80.9±2.0 <sup>bc</sup>  | 83.0±4.7 <sup>bc</sup>  | 92.8±13.8 <sup>c</sup>  | 100.2±6.8 <sup>c</sup>   | 93.0±7.2 <sup>c</sup>   | < 0.0001                 |
| Selk                | 40.9±3.6 <sup>a</sup>     | 65.7±1.5 <sup>b</sup>   | 79.6±7.1 <sup>bc</sup>   | 93.1±8.8 <sup>c</sup>   | 84.5±10.4 <sup>bc</sup> | 88.1±5.0 <sup>c</sup>   | 99.8±1.4 <sup>c</sup>    | 84.6±4.0 <sup>bc</sup>  | 0.0001                   |
| Selm                | 84.3±2.9 <sup>a</sup>     | 87.1±1.1 <sup>ab</sup>  | 86.1±5.0 <sup>ab</sup>   | 115.2±9.7 <sup>c</sup>  | 103.4±7.8 <sup>bc</sup> | 111.2±3.8 <sup>c</sup>  | 100.1±5.7 <sup>abc</sup> | 88.8±1.5 <sup>ab</sup>  | 0.004                    |
| Sepp1               | 61.6±5.1 <sup>a</sup>     | 72.9±8.5 <sup>ab</sup>  | 75.5±3.1 <sup>abc</sup>  | 96.4±1.8 <sup>d</sup>   | 89.8±3.0 <sup>cd</sup>  | 89.6±1.9 <sup>cd</sup>  | 99.8±2.3 <sup>d</sup>    | 84.3±7.5 <sup>bcd</sup> | 0.0005                   |
| Sepw1 <sup>3</sup>  | 18.6±1.6 <sup>a</sup>     | 42.1±1.0 <sup>ab</sup>  | 60.1±3.8 <sup>bc</sup>   | 77.6±1.2 <sup>bcd</sup> | 76.2±4.5 <sup>bcd</sup> | 110.0±12.1 <sup>d</sup> | 100.6±8.7 <sup>d</sup>   | 80.8±3.8 <sup>cd</sup>  | < 0.0001                 |
| Txnrd1              | 60.9±1.2 <sup>a</sup>     | 67.2±2.9 <sup>ab</sup>  | 80.4±7.5 <sup>bc</sup>   | 108.1±8.5 <sup>d</sup>  | 103.4±4.7 <sup>d</sup>  | 94.6±2.9 <sup>cd</sup>  | 100.2±6.0 <sup>d</sup>   | 95.2±8.8 <sup>cd</sup>  | 0.0002                   |
| Txnrd2              | 59.7±1.7                  | 82.9±8.2                | 91.7±16.1                | 97.9±3.0                | 93.8±6.8                | 88.8±10.5               | 101.8±14.7               | 92.2±12.4               | 0.22                     |
| Kidney              |                           |                         |                          |                         |                         |                         |                          |                         |                          |
| Gpx1                | 33.9±1.8 <sup>a</sup>     | 55.2±3.3 <sup>ab</sup>  | 74.8±8.1 <sup>bc</sup>   | 92.1±8.1 <sup>c</sup>   | 95.5±10.0 <sup>c</sup>  | 93.4±9.1 <sup>c</sup>   | 102.0±16.2 <sup>c</sup>  | 95.2±11.6 <sup>c</sup>  | 0.0011                   |
| Gpx3                | 57.9±5.6                  | 80.6±6.8                | 71.7±8.6                 | 108.2±19.4              | 105.8±13.0              | 105.5±7.6               | 103.1±19.8               | 102.9±22.3              | 0.16                     |
| Gpx4                | 126.8±7.2                 | 110.8±14.6              | 122.6±7.8                | 96.8±12.6               | 97.7±8.8                | 102.6±14.3              | 103.4±20.6               | 113.3±13.8              | 0.66                     |
| Selh                | 53.3±8.4 <sup>a</sup>     | 74.1±4.2 <sup>ab</sup>  | 96.3±2.2 <sup>bc</sup>   | 88.3±16.8 <sup>bc</sup> | 105.3±9.6 <sup>bc</sup> | 113.7±9.8 <sup>c</sup>  | 101.0±12.3 <sup>bc</sup> | 108.8±4.7 <sup>c</sup>  | 0.007                    |
| Selm                | 98.8±10.7                 | 95.7±9.0                | 109.2±8.9                | 103.6±5.4               | 109.6±18.8              | 101.2±10.0              | 102.1±16.2               | 99.8±14.4               | 0.99                     |
| Sepw1               | 41.3±4.6 <sup>a</sup>     | 59.7±4.7 <sup>ab</sup>  | 84.5±7.3 <sup>bc</sup>   | 99.4±7.0 <sup>c</sup>   | 89.7±3.0 <sup>c</sup>   | 91.1±5.6 <sup>c</sup>   | 102.6±18.1 <sup>c</sup>  | 99.4±9.8 <sup>c</sup>   | 0.001                    |
| Sephs2 <sup>3</sup> | 134.0±4.1 <sup>b</sup>    | 117.8±5.1 <sup>ab</sup> | 124.5±11.3 <sup>ab</sup> | 98.6±11.8 <sup>ab</sup> | 86.1±4.9 <sup>a</sup>   | 91.2±0.5 <sup>a</sup>   | 99.7±2.3 <sup>ab</sup>   | 81.1±2.9 <sup>a</sup>   | 0.0006                   |

<sup>1</sup>Values are presented as mean±SEM, n = 3/diet. Means in a row with superscripts without a common letter differ significantly, *P* < 0.05.

<sup>2</sup>Relative selenoprotein mRNA values determined by qRT-PCR, determined in triplicate for each sample of total RNA isolated from the indicated tissue, and normalized to the average of Gapdh and Actb mRNA in the same sample, and expressed as a percentage of the levels in Se-adequate (0.2 µg Se/g diet) rats.

<sup>3</sup>Differences determined by Scheffé's test as variances were not homogeneous.

## Online Supporting Material - Barnes et al.

**SUPPLEMENTAL TABLE 4** Effect of dietary selenium on selenoprotein mRNA abundance in rats (Expt. 2)<sup>1</sup>.

| Tissue/<br>Gene     | Dietary Se (µg Se/g diet) |                         |                         |                          |                          |                          |                         |                          |                         |                          | ANOVA<br><i>P</i> -value |
|---------------------|---------------------------|-------------------------|-------------------------|--------------------------|--------------------------|--------------------------|-------------------------|--------------------------|-------------------------|--------------------------|--------------------------|
|                     | 0                         | 0.016                   | 0.04                    | 0.06                     | 0.08                     | 0.12                     | 0.16                    | 0.24                     | 0.4                     | 0.8                      |                          |
| Liver               |                           |                         |                         |                          |                          |                          |                         |                          |                         |                          |                          |
| Dio1                | 46.6±8.3 <sup>a</sup>     | 65.2±6.5 <sup>ab</sup>  | 78.6±4.4 <sup>bcd</sup> | 74.2±4.9 <sup>bc</sup>   | 86.0±6.5 <sup>bcd</sup>  | 97.1±3.9 <sup>cde</sup>  | 93.9±0.5 <sup>cde</sup> | 113.3±4.1 <sup>e</sup>   | 85.2±7.8 <sup>bcd</sup> | 99.4±16.1 <sup>de</sup>  | 0.0002                   |
| Gpx1 <sup>3</sup>   | 9.5±1.0 <sup>a</sup>      | 20.3±4.7 <sup>a</sup>   | 51.6±13.8 <sup>ab</sup> | 83.5±12.2 <sup>bc</sup>  | 88.6±3.1 <sup>bc</sup>   | 90.6±6.4 <sup>bc</sup>   | 87.2±1.8 <sup>bc</sup>  | 96.8±8.3 <sup>bc</sup>   | 111.9±1.7 <sup>c</sup>  | 98.8±4.3 <sup>c</sup>    | <0.0001                  |
| Gpx3                | 34.9±2.9 <sup>a</sup>     | 56.3±8.7 <sup>ab</sup>  | 84.5±14.1 <sup>bc</sup> | 80.2±3.2 <sup>bc</sup>   | 85.9±8.3 <sup>bc</sup>   | 84.2±1.9 <sup>bc</sup>   | 106.2±16.6 <sup>c</sup> | 108.6±16.4 <sup>c</sup>  | 112.1±20.3 <sup>c</sup> | 80.9±9.8 <sup>bc</sup>   | 0.005                    |
| Selh                | 21.3±2.8 <sup>a</sup>     | 34.9±4.5 <sup>a</sup>   | 71.5±12.3 <sup>b</sup>  | 85.0±6.7 <sup>bcd</sup>  | 94.4±9.2 <sup>bcd</sup>  | 99.9±4.6 <sup>cd</sup>   | 75.1±9.6 <sup>bc</sup>  | 99.4±5.1 <sup>cd</sup>   | 108.2±5.9 <sup>d</sup>  | 104.9±12.4 <sup>d</sup>  | <0.0001                  |
| Selk                | 25.2±6.9 <sup>a</sup>     | 50.3±9.0 <sup>a</sup>   | 80.1±18.7 <sup>b</sup>  | 102.9±5.5 <sup>b</sup>   | 94.6±3.3 <sup>b</sup>    | 100.4±6.7 <sup>b</sup>   | 91.6±4.8 <sup>b</sup>   | 101.8±8.9 <sup>b</sup>   | 99.6±6.8 <sup>b</sup>   | 100.0±9.2 <sup>b</sup>   | <0.0001                  |
| Sepn1               | 53.8±9.2 <sup>a</sup>     | 73.3±8.6 <sup>ab</sup>  | 85.8±6.0 <sup>bc</sup>  | 97.6±3.0 <sup>bc</sup>   | 102.1±8.2 <sup>c</sup>   | 96.4±8.0 <sup>bc</sup>   | 102.1±10.4 <sup>c</sup> | 106.1±4.1 <sup>c</sup>   | 98.2±11.2 <sup>bc</sup> | 93.7±11.0 <sup>c</sup>   | 0.007                    |
| Sepp1               | 52.5±7.1 <sup>a</sup>     | 69.3±6.6 <sup>ab</sup>  | 80.4±7.9 <sup>bc</sup>  | 100.0±9.4 <sup>c</sup>   | 98.5±6.3 <sup>c</sup>    | 102.4±2.5 <sup>c</sup>   | 101.5±5.7 <sup>c</sup>  | 84.7±11.0 <sup>bc</sup>  | 102.5±1.7 <sup>c</sup>  | 103.1±10.6 <sup>c</sup>  | 0.0008                   |
| Selt                | 43.8±4.8 <sup>a</sup>     | 67.7±13.7 <sup>ab</sup> | 84.3±22.0 <sup>b</sup>  | 93.2±10.2 <sup>b</sup>   | 100.7±12.3 <sup>b</sup>  | 101.7±15.4 <sup>b</sup>  | 86.0±11.0 <sup>b</sup>  | 100.1±1.6 <sup>b</sup>   | 104.3±10.3 <sup>b</sup> | 99.4±6.8 <sup>b</sup>    | 0.04                     |
| Sepw1               | 16.0±1.9 <sup>a</sup>     | 31.3±6.7 <sup>ab</sup>  | 53.7±7.2 <sup>bc</sup>  | 68.0±2.9 <sup>cd</sup>   | 80.3±6.2 <sup>cd</sup>   | 86.3±12.9 <sup>de</sup>  | 76.5±6.8 <sup>cd</sup>  | 93.6±11.9 <sup>de</sup>  | 112.1±14.9 <sup>e</sup> | 92.9±8.9 <sup>de</sup>   | <0.0001                  |
| Sep15 <sup>3</sup>  | 55.5±10.4                 | 67.9±13.5               | 75.0±15.3               | 93.1±10.5                | 92.4±2.3                 | 90.4±1.9                 | 91.5±5.2                | 103.4±0.9                | 100.9±2.4               | 97.9±7.8                 | 0.01                     |
| Txnrd3              | 48.6±8.6 <sup>a</sup>     | 59.3±3.0 <sup>ab</sup>  | 84.6±16.1 <sup>c</sup>  | 85.1±3.3 <sup>c</sup>    | 89.5±3.7 <sup>cd</sup>   | 101.3±10.2 <sup>cd</sup> | 78.7±4.5 <sup>bc</sup>  | 100.1±2.3 <sup>cd</sup>  | 113.6±6.0 <sup>d</sup>  | 94.0±9.6 <sup>cd</sup>   | 0.0004                   |
| Kidney              |                           |                         |                         |                          |                          |                          |                         |                          |                         |                          |                          |
| Gpx1                | 21.3±2.1 <sup>a</sup>     | 42.8±7.7 <sup>ab</sup>  | 65.6±4.4 <sup>bc</sup>  | 87.1±1.8 <sup>cde</sup>  | 85.7±10.2 <sup>cde</sup> | 99.3±12.1 <sup>de</sup>  | 116.2±8.0 <sup>e</sup>  | 101.5±7.8 <sup>de</sup>  | 100.8±6.5 <sup>de</sup> | 80.2±19.9 <sup>cd</sup>  | <0.0001                  |
| Gpx3                | 40.1±4.7 <sup>a</sup>     | 53.6±21.3 <sup>ab</sup> | 73.1±24.6 <sup>ab</sup> | 86.5±5.3 <sup>bc</sup>   | 88.5±10.0 <sup>bc</sup>  | 94.7±11.1 <sup>bc</sup>  | 103.7±11.4 <sup>c</sup> | 97.9±20.9 <sup>bc</sup>  | 107.6±10.4 <sup>c</sup> | 89.4±6.0 <sup>bc</sup>   | 0.05                     |
| Selh                | 40.8±5.7 <sup>a</sup>     | 60.2±4.1 <sup>b</sup>   | 75.4±5.7 <sup>bc</sup>  | 87.5±1.0 <sup>cd</sup>   | 98.9±6.3 <sup>d</sup>    | 96.4±4.6 <sup>d</sup>    | 106.6±10.3 <sup>d</sup> | 92.9±9.9 <sup>cd</sup>   | 97.2±4.5 <sup>d</sup>   | 99.0±4.2 <sup>d</sup>    | <0.0001                  |
| Selk                | 59.5±2.2 <sup>a</sup>     | 71.3±3.3 <sup>ab</sup>  | 85.3±8.1 <sup>bc</sup>  | 88.9±5.7 <sup>bcd</sup>  | 92.8±2.4 <sup>cd</sup>   | 91.5±3.2 <sup>cd</sup>   | 104.0±4.4 <sup>cd</sup> | 92.3±2.0 <sup>cd</sup>   | 91.3±4.7 <sup>cd</sup>  | 108.0±14.1 <sup>d</sup>  | 0.0008                   |
| Sepn1               | 56.1±6.3 <sup>a</sup>     | 70.6±7.2 <sup>ab</sup>  | 95.5±9.4 <sup>ab</sup>  | 71.4±8.2 <sup>ab</sup>   | 99.0±18.6 <sup>ab</sup>  | 88.7±11.2 <sup>ab</sup>  | 77.0±2.5 <sup>ab</sup>  | 97.3±12.2 <sup>ab</sup>  | 93.2±5.7 <sup>ab</sup>  | 103.1±5.2 <sup>b</sup>   | 0.04                     |
| Sepw1               | 29.0±1.6 <sup>a</sup>     | 51.1±6.1 <sup>b</sup>   | 74.4±3.8 <sup>cd</sup>  | 70.9±5.1 <sup>c</sup>    | 85.2±8.6 <sup>cde</sup>  | 88.8±8.5 <sup>cde</sup>  | 83.3±6.0 <sup>cde</sup> | 113.6±1.8 <sup>f</sup>   | 92.9±4.7 <sup>de</sup>  | 96.9±6.4 <sup>ef</sup>   | <0.0001                  |
| Sephs2              | 234.5±62.0 <sup>b</sup>   | 140.9±29.1 <sup>a</sup> | 102.9±12.0 <sup>a</sup> | 117.5±7.3 <sup>a</sup>   | 89.1±8.1 <sup>a</sup>    | 94.8±5.9 <sup>a</sup>    | 124.2±7.4 <sup>a</sup>  | 92.7±10.3 <sup>a</sup>   | 88.6±3.0 <sup>a</sup>   | 104.2±13.1 <sup>a</sup>  | 0.008                    |
| Txnrd1 <sup>3</sup> | 60.0±1.3 <sup>a</sup>     | 71.8±7.6 <sup>ab</sup>  | 82.2±2.9 <sup>abc</sup> | 92.7±3.6 <sup>abc</sup>  | 86.6±0.8 <sup>abc</sup>  | 100.1±1.8 <sup>bc</sup>  | 118.3±0.7 <sup>c</sup>  | 94.8±8.9 <sup>abc</sup>  | 93.3±2.0 <sup>abc</sup> | 96.0±12.2 <sup>abc</sup> | <0.0001                  |
| Muscle              |                           |                         |                         |                          |                          |                          |                         |                          |                         |                          |                          |
| Gpx3                | 48.2±3.0 <sup>a</sup>     | 83.9±7.4 <sup>b</sup>   | 98.5±6.6 <sup>bc</sup>  | 98.1±6.3 <sup>bc</sup>   | 117.8±1.7 <sup>c</sup>   | 103.6±6.3 <sup>bc</sup>  | 87.5±15.6 <sup>bc</sup> | 106.4±11.6 <sup>bc</sup> | 94.5±16.8 <sup>bc</sup> | 91.2±4.9 <sup>bc</sup>   | 0.005                    |
| Selh                | 53.9±8.3 <sup>a</sup>     | 47.1±9.5 <sup>a</sup>   | 93.6±13.0 <sup>ab</sup> | 102.7±13.1 <sup>b</sup>  | 85.3±13.8 <sup>ab</sup>  | 91.1±14.6 <sup>ab</sup>  | 119.2±22.5 <sup>b</sup> | 76.6±13.8 <sup>ab</sup>  | 83.8±13.0 <sup>ab</sup> | 123.7±17.1 <sup>b</sup>  | 0.02                     |
| Sepw1               | 29.3±3.2 <sup>a</sup>     | 29.9±8.7 <sup>a</sup>   | 80.0±6.3 <sup>ab</sup>  | 100.7±10.4 <sup>ab</sup> | 68.3±4.2 <sup>ab</sup>   | 98.2±21.8 <sup>ab</sup>  | 105.0±33.8 <sup>b</sup> | 81.4±28.1 <sup>ab</sup>  | 84.4±37.2 <sup>ab</sup> | 140.2±23.8 <sup>b</sup>  | 0.04                     |

<sup>1</sup>Values are presented as mean±SEM, n = 3/diet. Means in a row with superscripts without a common letter differ significantly, *P* < 0.05.

<sup>2</sup>Relative selenoprotein mRNA values determined by qRT-PCR, determined in triplicate for each sample of total RNA isolated from the indicated tissue, and normalized to the average of Gapdh and Actb mRNA in the same sample, and expressed as a percentage of Se-adequate plateau levels.

<sup>3</sup>Differences determined by Scheffé's test as variances were not homogeneous.

**Online Supporting Material - Barnes et al.**

**SUPPLEMENTAL TABLE 5** Selenium regulation of the selenoproteome in rat liver, kidney, and muscle<sup>1</sup>

| Gene <sup>2</sup> | Name                                | Liver       | Kidney                   | Muscle            |
|-------------------|-------------------------------------|-------------|--------------------------|-------------------|
| Dio1              | Deiodinase, iodothyronine, type I   | Moderate    | Low                      | Low               |
| Dio2              | Deiodinase, iodothyronine, type II  | Low         | Low                      | Low               |
| Dio3              | Deiodinase, iodothyronine, type III | Low         | Low                      | Low               |
| Gpx1              | Glutathione peroxidase 1            | Very High   | High                     | High <sup>3</sup> |
| Gpx2              | Glutathione peroxidase 2            | Low         | Low                      | Low               |
| Gpx3              | Glutathione peroxidase 3            | High        | High                     | Moderate          |
| Gpx4              | Glutathione peroxidase 4            | Low         | Low                      | Low               |
| Selh              | Selenoprotein H                     | High        | High                     | Moderate          |
| Seli              | Selenoprotein I                     | Low         | Low                      | Low               |
| Selk              | Selenoprotein K                     | High        | Moderate                 | Low               |
| Selm              | Selenoprotein M                     | Low         | Low                      | Low               |
| Sepr1             | Selenoprotein N                     | Moderate    | Moderate                 | Low               |
| Selo              | Selenoprotein O                     | Low         | Low                      | Low               |
| Sepp1 (SelP)      | Selenoprotein P                     | Moderate    | Low                      | Low               |
| Sepr1 (MsrB1)     | Methionine-R-sulfoxide reductase    | Low         | Low                      | Low               |
| Sels              | Selenoprotein S                     | Low         | Low                      | Low               |
| Selt              | Selenoprotein T                     | Moderate    | Low                      | Low               |
| Selv              | Selenoprotein V                     | Not Present | Not Present              | Low               |
| Sepw1             | Selenoprotein W                     | High        | High                     | High              |
| Sep15             | Selenoprotein 15                    | Moderate    | Low                      | Low               |
| Sephs2 (SPS2)     | Selenophosphate synthetase 2        | Low         | Moderate-Up <sup>4</sup> | Low               |
| Txnrd1            | Thioredoxin reductase 1             | Low         | Moderate                 | Low               |
| Txnrd2            | Thioredoxin reductase 2             | Low         | Low                      | Low               |
| Txnrd3            | Thioredoxin reductase 3             | Moderate    | Low                      | Low               |
| <b>Totals:</b>    | <b>Very High</b>                    | 1           | 0                        | 0                 |
|                   | <b>High</b>                         | 4           | 4                        | 1 (+1 NS)         |
|                   | <b>Moderate</b>                     | 6           | 4                        | 2                 |
|                   | <b>Low</b>                          | 12          | 15                       | 20                |
|                   | <b>Not Present</b>                  | 1           | 1                        | 0                 |

<sup>1</sup>Susceptibility of all 24 selenoproteins in the rat selenoproteome to Se regulation in Se-deficient tissues. Selenoprotein mRNA levels were determined by qRT-PCR to compare levels in Se-deficient versus Se-adequate (0.24 µg Se/g diet) rats: **very high** = <10.9% of Se-adequate; **high** = 11-40.9% of Se-adequate; **moderate** = 41-70% of Se-adequate; **Low** = >70% of Se-adequate; **not present** = not detected by qRT-PCR.

<sup>2</sup>Gene symbol with common alternative symbol given in parentheses.

<sup>3</sup>Se-deficient muscle Gpx1 mRNA decreases to 37% of Se-adequate levels but with  $P = 0.14$

<sup>4</sup> Kidney Sephs2 mRNA is moderately up-regulated in Se deficiency.
